# Supplementary material
Source: PubMed Central journal article supplement (PMC6641176)
Supplement: ao7b00261_si_001.pdf [file ao7b00261_si_001.pdf]

# **Making monomeric Aquaporin Z by disrupting the hydrophobic tetramer interface**

Victoria Schmidt\* and James N. Sturgis\*

*Laboratoire d'Ingenierie des Systemes Macromoleculaires, IMM, CNRS and Aix-Marseille*

*Univ. 31 Chemin Joseph Aiguier, Marseille 13420, France*

E-mail: [victoria.schmidt@imm.cnrs.fr](mailto:victoria.schmidt@imm.cnrs.fr); [james.sturgis@univ-amu.fr](mailto:james.sturgis@univ-amu.fr)

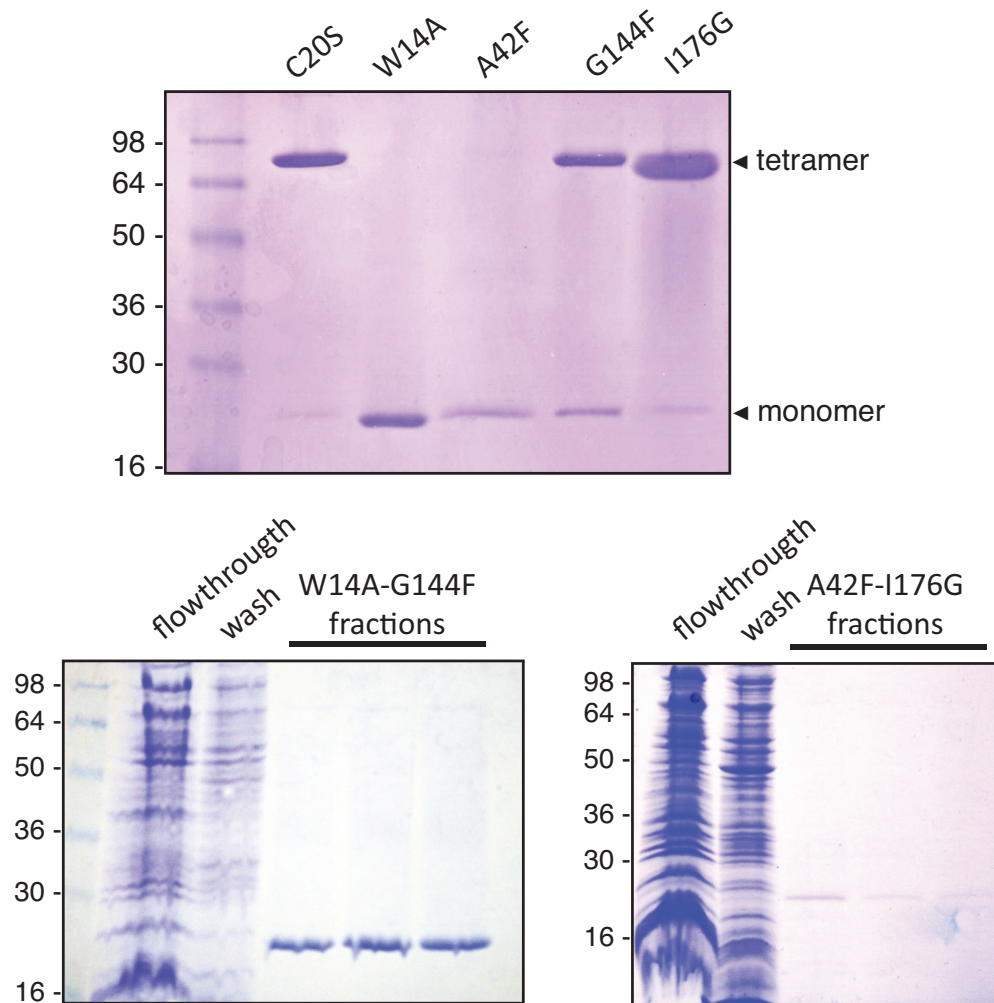

Figure S1: Coomassie blue stained SDS-PAGE showing the purified proteins. The top gel shows purified proteins from the C<sub>20</sub>S reference strain, and the four single mutants characterized here: W<sub>14</sub>A, A<sub>42</sub>F, G<sub>144</sub>F and I<sub>176</sub>G. As can be readily appreciated the different proteins are relatively pure and show mainly tetrameric (C<sub>20</sub>S, I<sub>176</sub>G), monomeric (W<sub>14</sub>A, A<sub>42</sub>F) or mixed (G<sub>144</sub>F) quaternary structure in this measurement. The lower panels show SDS-PAGE during the purification of the two double mutants. This illustrates the purity of the proteins obtained, and also the very low yield of the A<sub>42</sub>F-I<sub>176</sub>G double mutant. On the left side of each gel are indicated the positions of molecular mass markers (in kDa).
